1 **Islands in the desert: Environmental distribution modelling**  
2 **of endemic flora reveals the extent of Pleistocene tropical**  
3 **relict vegetation in southern Arabia**

4

5 James S. Borrell<sup>1\*</sup>, Ghudaina Al Issaey<sup>2</sup>, Darach A. Lupton<sup>2</sup>, Thomas Starnes<sup>3</sup>, Abdulrahman  
6 Al Hinai<sup>2</sup>, Saif Al Hatmi<sup>2</sup>, Rebecca A. Senior<sup>4</sup>, Tim Wilkinson<sup>1</sup>, Jo L.H. Milborrow<sup>5</sup>, Andrew  
7 Stokes-Rees<sup>6</sup>, Annette Patzelt<sup>2</sup>.

8

9 <sup>1</sup>Jodrell Laboratory, Royal Botanic Gardens, Kew, Richmond, Surrey, TW9 3DS, UK. <sup>2</sup>Oman  
10 Botanic Garden, Muscat, Oman. <sup>3</sup>RSPB Centre for Conservation Science, Royal Society for  
11 the Protection of Birds, The Lodge, Sandy, Bedfordshire, SG19 2DL, UK. <sup>4</sup>Department of  
12 Animal and Plant Sciences, Alfred Denny Building, University of Sheffield, Western Bank,  
13 Sheffield, S10 2TN. <sup>5</sup>Biodiversity Information Service, Unit 4, Royal Buildings, 6 Bulwark,  
14 Brecon, Powys, LD3 7LB. <sup>6</sup>Outward Bound Canada, 550 Bayview ave., Building 1 suite 201,  
15 Toronto, ON, M4W 3X8

16 **Running title:** A pleistocene refugium in southern Arabia

17 **\*Author for correspondence:** Dr. James Borrell (j.borrell@kew.org)

18

19

20

21

22 **ABSTRACT**

23 **Background and Aims:** Southern Arabia is a global biodiversity hotspot with a high  
24 proportion of endemic desert-adapted plants. Here we examine evidence for a Pleistocene  
25 climate refugium in the southern Central Desert of Oman, and its role in driving  
26 biogeographical patterns of endemism.

27 **Methods:** Distribution data for seven narrow-range endemic plants were collected  
28 systematically across 195 quadrats, together with incidental and historic records. Important  
29 environmental variables relevant to arid coastal areas, including night time fog and cloud cover  
30 were developed for the study area. Environmental niche models were built and tuned for each  
31 species and spatial overlap examined.

32 **Key Results:** A region of the Jiddat Al Arkad reported independent high model suitability for  
33 all species. Examination of environmental data across southern Oman indicates that the Jiddat  
34 Al Arkad displays a regionally unique climate with higher intra-annual stability, due in part to  
35 the influence of the southern monsoon. Despite this, relative importance of environmental  
36 variables was highly differentiated among species, suggesting characteristic variables such as  
37 coastal fog are not major cross-species predictors at this scale.

38 **Conclusions:** The co-occurrence of a high number of endemic study species within a narrow  
39 monsoon-influenced region is indicative of a refugium with low climate change velocity.  
40 Combined with climate analysis, our findings provide strong evidence for a southern Arabian  
41 Pleistocene refugium in the Oman's Central Desert. We suggest this refugium has acted as an  
42 isolated temperate and mesic island in the desert, resulting in the evolution of these narrow-  
43 range endemic flora. Based on the composition of species, this system may represent the  
44 northernmost remnant of a continuous belt of mesic vegetation formerly ranging from Africa

45 to Asia, with close links to the flora of East Africa. This has significant implications for future  
46 conservation of endemic plants in an arid biodiversity hotspot.

47

## 48 **KEYWORDS**

49 Arabian Peninsula, Central Desert, Coastal fog desert, Desert endemic, Ecological niche  
50 modelling, Important Plant Areas, Oman, Pleistocene, Refugia.

51

## 52 **INTRODUCTION**

53 Southern Arabia is part of the Horn of Africa global biodiversity hotspot, and is one of only  
54 two hotspots that are entirely arid (Mittermeier *et al.* 2005; Mallon 2013). The flora of southern  
55 Arabia arises from the relatively late separation of Arabia from Africa and Asia around 25  
56 million years before present (Raven and Axelrod 1974; Delany 1989). During the Miocene  
57 Arabia supported palaeo-tropical vegetation with swamps and open savannah grassland  
58 (Whybrow and McClure 1981). This was progressively replaced by more drought-adapted  
59 vegetation through the Pliocene, with mesic elements of the flora persisting only in climatically  
60 favourable refugia (Kürschner 1998; Jolly *et al.* 2009). The environment of southern Arabia  
61 subsequently oscillated between climatic extremes throughout the Quaternary period  
62 (Fleitmann and Matter 2009; Parker 2010; Jennings *et al.* 2015). These oscillations, combined  
63 with the relative stability of localized climatic refugia may have contributed to the high degree  
64 of species endemism (Patzelt, 2015; Sandel *et al.*, 2011).

65 The biogeographic consequences of contraction and expansion from glacial refugia have been  
66 well described in the temperate zones of Europe and North America (Bennett *et al.* 1991;  
67 Comes and Kadereit 1998; Birks and Willis 2008; Keppel *et al.* 2012; Wang *et al.* 2014). By  
68 comparison, these processes are poorly known in the arid environments of the Arabian  
69 Peninsula (Ghazanfar, 1998; Meister, Hubaishan, Kilian, & Oberprieler, 2006; Patzelt, 2015).

70 Therefore establishing the spatiotemporal distribution of past climate refugia in southern  
71 Arabia is likely to have important implications for future conservation planning (Al-Abbasi *et*  
72 *al.* 2010), building evolutionary resilience under climate change (Sgrò *et al.* 2011; Keppel *et*  
73 *al.* 2012) and even interpreting the history of hominid dispersal out of Africa (Jennings *et al.*  
74 2015; Gandini *et al.* 2016).

75 A key center for plant endemism in southern Arabia is Oman's Central Desert (Ghazanfar,  
76 2004; Miller & Nyberg, 1990; Patzelt, 2014; White & Léonard, 1990). The Central Desert is a  
77 hyper-arid region, characterized by scarce precipitation often less than 100 mm/pa with high  
78 inter-annual variability and temperatures ranging from 6°C to more than 50°C (Stanley Price  
79 *et al.* 1988; Fisher and Membery 1998; Almazroui *et al.* 2013). Provisionally divided into  
80 'northern' and 'southern' systems, the Central Desert has relatively low species diversity, but  
81 the highest proportion of range restricted endemic and regionally endemic plants in Oman  
82 (Patzelt, 2015). This represents an ideal study system in which to test for evidence of climatic  
83 refugia and their influence on the floral biogeography of southern Arabia.

84 Despite significant progress in documenting the flora of Oman (Brinkmann *et al.*, 2011;  
85 Ghazanfar, 1998, 2004; Ghazanfar & Fisher, 2013; Miller & Cope, 1996; Patzelt, 2009, 2014)  
86 high resolution plant diversity and distribution data are limited or lacking for many areas,  
87 hindering our ability to test these biogeographic hypotheses and identify putative refugia. To  
88 address this knowledge gap, here we report results of a systematic botanic survey of the  
89 southern Central Desert. We focus on seven high priority narrow range endemic desert plants  
90 (Table 1; Figure 1), restricted to the coastal belt and the adjacent escarpment and identified  
91 through development of the Oman Red Data Book (Patzelt, 2014).

92 To enable a transition from survey data to predictive distribution maps we use an environmental  
93 niche modelling (ENM) approach. ENMs are a suite of methods used to establish the

94 relationship between a species and a set of environmental variables (Elith and Leathwick, 2009;  
95 Peterson, Papeş and Soberón, 2015). In principle, ENMs evaluate the environmental conditions  
96 in grid cells known to be occupied by a species and identify additional cells that represent  
97 similar environmental conditions (Merow, Smith and Silander, 2013). The species' niche can  
98 then be projected across the study area to predict its spatial distribution and identify  
99 environmental variables that contribute significantly to model performance (Searcy and Shaffer  
100 2016). In this study we benefit from both presence and absence survey data and a stratified  
101 survey design, which negates many of the biases common in environmental niche models  
102 (Jiménez-Valverde *et al.* 2008; Warren and Seifert 2011).

103 To distinguish amongst alternative environmental drivers for local endemism, selection of  
104 appropriate environmental modelling variables in arid environments is important (Dilts *et al.*  
105 2015; Title and Bemmels 2018). In other coastal desert systems, endemic plant distributions  
106 are strongly influenced by the presence of cloud shade and fog, which causes condensation on  
107 leaves and stems that trickles down to root systems (Cereceda *et al.* 2008; Fischer *et al.* 2009).  
108 Given the extreme temperatures and low precipitation, the presence of coastal fog and the  
109 cooling effect of the prevailing wind have been hypothesised to be a key driver of Central  
110 Desert flora distributions (Miller, 1994; Patzelt, 2015; Price *et al.*, 1988). The presence of  
111 coastal fog is supported by data from the northern Central Desert in 1984, where water collected  
112 from fog collectors at Jiddat al Harasisi ranged from 0.08 L/m<sup>2</sup> in January to 3.6 L/m<sup>2</sup>. A total  
113 of 93 nights with fog moisture were recorded across the year, with fog moisture at ground level  
114 coinciding with reduced night-time temperatures, increased humidity and a wind speed less  
115 than 15 Km/h (Price *et al.*, 1988). In a subsequent study (Fisher and Membery 1998) a monthly  
116 maximum of 4.0 L/m<sup>2</sup> during March and a minimum 2.5 L/m<sup>2</sup> during January, May, June and  
117 December was recorded. To our knowledge, no empirical data is available on coastal fog from  
118 the southern central desert.

119 Validation of environmental variables across a large, arid and sparsely populated study area  
120 such as the Central Desert is also exacerbated by the paucity of weather stations (meaning that  
121 global climate models are highly interpolated) and the fact that where weather stations do exist,  
122 cloud cover and coastal fog are rarely recorded. To address these shortfalls, we make use of  
123 the newly available WorldClim2 dataset that incorporates high accuracy remotely sensed  
124 maximum and minimum land surface temperature (Fick and Hijmans 2017), together with  
125 remotely sensed cloud cover data (Wilson and Jetz 2016). We also incorporate remotely sensed  
126 fog and putative fog covariates, to explore whether these variables contribute significantly to  
127 Central Desert species distributions. Specifically, we derive night time fog intensity from  
128 MODIS data (MODIS Characterization Support Team (MCST) 2018) using the approach of  
129 Chaurasia et al. (2011), as well as topography (including elevation, slope, aspect and terrain  
130 roughness, as locally higher areas may catch more moisture (Schemenauer *et al.* 1987)), wind  
131 speed and night time land surface temperature (LST) (Wan, Hook, & Hulley, 2018). As an  
132 additional line of evidence in assessing the importance of coastal fog, we also survey  
133 physiological fog capture adaptations across our study species using the approach of Larraín-  
134 Barrios *et al.* (2018).

135 Here, building on novel systematic survey data from the Central Desert, we aim to address  
136 three main questions. First, we use newly available climate data to examine the influence of  
137 the southern monsoon and coastal fog influx on the Central Desert climate. Second, we model  
138 the distributions of seven high priority narrow-range endemics, and test the hypothesis that the  
139 same environmental variables are consistently important across taxa. Third, we consider  
140 evidence for past climatic refugia and their influence on the current floral biogeography of the  
141 Central Desert. We consider these data in the context of conserving rare desert endemics across  
142 southern Arabia, a global biodiversity hotspot.

## 143 **MATERIALS AND METHODS**

## 144 **Study area**

145 The southern Central Desert is dominated by the Jiddat Al Arkad, a meandering escarpment of  
146 50 to 100 m dissected by extensive wadi systems, depressions and runnels which discharge  
147 into the Sahil Al Jazir coastal plain. Surface flows are only present following heavy rains.  
148 Geologically, the study area is dominated by Oligocene – Miocene white bioclastic limestone  
149 with coral debris flow deposits and laminated dolomitic limestone (Patel 1992). Soil is  
150 predominantly Calciorthis – gravelly sandy loam on alluvial fans and stream terraces and  
151 torriorthents (rock outcrops) weakly or undeveloped, low in organic matter and moderately  
152 calcareous (Dregne 1976).

153 The vegetation is classified into three units as per Patzelt, (2015): i) *Acacia tortilis* – *Prosopis*  
154 *cineraria* open woodland. Common grass and shrub species include the endemic shrubs,  
155 *Convolvulus oppositifolius* and *Ochradenus harsusiticus* and endemic grass *Stipagrostis*  
156 *sokotrana*. ii) Xeromorphic dwarf shrubland intermixed with grasses and annual species. The  
157 dwarf palm *Nannorrhops ritchieana* and *A. ehrenbergiana* are common in sandy depressions  
158 close to the coastal escarpments. iii) Xeromorphic dwarf shrubland with *Searsia gallergheri* and  
159 *O. harsusiticus*. In addition to flowering plants, several species of corticolous and saxicolous  
160 lichens and epilithic cyanobacteria occur here, of which most are restricted to the putatively  
161 fog-affected zones (Ghazanfar & Gallagher, 1998). The seven study species (Figure 1) are  
162 considered a part of, though not restricted to, the xeromorphic dwarf shrubland community. A  
163 description of their known habitat and conservation status is provided in Table 1.

## 164 **Field surveys and plant morphology**

165 Fieldwork was conducted during the period 13<sup>th</sup> – 24<sup>th</sup> January 2017, from Ras Madrakah,  
166 across the Sahil Al Jazer (coastal plain) to the southern extent of the Jiddat Al Arkad, as part  
167 of the Central Desert Botanic Expedition 2017. A stratified survey strategy was designed  
168 orientating ten 20 km transects at 315 degrees (NW) along a 270 km portion of coastline, at 30

169 km intervals. This approach was designed to cross multiple environmental gradients that  
170 frequently run perpendicular to the coastline. Stratified quadrat locations at 1 km intervals were  
171 plotted prior to field work and their coordinates uploaded to handheld GPS units (Garmin,  
172 Oregon). Due to the remote nature of the study area, with several deep wadis bisecting these  
173 transects and inhibiting access, some portions of these transects were not surveyed. When  
174 moving between transects we opportunistically sampled additional quadrats at 5 km intervals  
175 and recorded incidental observations of target species to maximise data collection. These  
176 additional quadrats were positioned via random number generation to determine distance and  
177 bearing from the vehicle. A significant portion of travel was away from roads, but where roads  
178 (mostly gravel tracks) were present, quadrat positioning began > 100 m from the road to  
179 mitigate disturbance bias in the vegetation recorded.

180 The following data were recorded for each quadrat: location, soil texture, soil pH, soil electrical  
181 conductivity (EC) (following the method of Zhang *et al.* 2005), total vegetation cover,  
182 maximum vegetation height, elevation, topography description and the presence, absence and  
183 count of the seven study species. Voucher specimens were collected for subsequent analysis,  
184 and are deposited in the Oman Botanic Garden herbarium (OBG) (Table 1). Summary statistics  
185 of quadrats were calculated in R software V3.1.2, implemented in RStudio (R Development  
186 Core Team, 2014; RStudio Team, 2015). A checklist of fog moisture capture and water use  
187 efficiency functional traits commonly observed in xerophytic plants was also collated,  
188 following the approach of (Larraín-Barrios *et al.* 2018). Each study species was examined and  
189 scored for their presence/absence and degree of development (see Tables S1 and S2,  
190 Supporting Information). In addition to observations recorded during this field study, historical  
191 records were included from relevant national and international collections, specifically; Oman  
192 Botanic Garden Herbarium (OBG), Sultan Qaboos University (SQUH), the Oman Natural



193 History Museum National Herbarium (ON) and the Royal Botanic Garden Edinburgh (E)  
194 (Summarised in Table 2; Figure S1, Supporting Information).

### 195 **Preparation of environmental variables**

196 To ensure we captured important environmental variation, we collated 54 bioclimatic variables  
197 covering the study area at 1 km resolution (Table S3, Supporting Information). In addition to  
198 WorldClim2 and Bioclim variables (Fick and Hijmans 2017), we generated a complementary  
199 set of bioclimatic layers that may better characterise arid environments using the ‘ENVIREM’  
200 package (Title and Bemmels 2018). We also sought to include night time fog, an important  
201 candidate variable in determining plant distributions in this region (Price et al. 1988).  
202 Specifically we followed the approach of Chaurasia *et al.* (2011) and classified fog based on  
203 the brightness temperature difference ( $\Delta BT$ ) of the 3.9 and 10.75  $\mu m$  bands (channels 22 and  
204 31) of the MODIS satellite. The emissive properties of these two bands differ for fog water  
205 droplets which are typically small, and do not excite the 3.9  $\mu m$  band, whereas emissivity for  
206 both cloud and fog droplets is approximately the same for the 10.75  $\mu m$  band (Hunt 1973).  
207 Twice nightly images at 1 km resolution were collated for the period 2001-17 (MODIS product:  
208 MOD021KM) from the LAADS database (MCST, 2018). Raw radiance values were converted  
209 to brightness temperature using Planck’s function implemented in ENVI software (Harris  
210 Geospatial) and the difference calculated. In contrast to Chaurasia *et al.* (2011), high quality  
211 real-time ground truth data is not available for our region, therefore we did not apply a fog  
212 classification threshold, instead we retained the data as a continuous variable with higher (less  
213 negative) values considered more likely to represent smaller fog water droplets.

214 At a fine spatial scale, other variables may also interact with fog moisture and influence the  
215 local ecology (Rastogi *et al.* 2016; Chung *et al.* 2017), thus we also incorporated several  
216 relevant fog proxies or co-variates. Cloud cover data (period 2001-15) was extracted from the  
217 global high-resolution cloud cover dataset generated by Wilson & Jetz (2016). Roughness,

218 Terrain Ruggedness Index (TRI), slope and aspect were generated from a digital elevation  
219 model (GTOPO30) using the R package ‘Raster’ (Hijmans, 2017). Night time Land Surface  
220 Temperature (LST) was obtained from the MODIS satellite mission at 1 km resolution (Wan  
221 et al., 2018). Important climate variables are plotted, together with the study, area using the  
222 package ‘RasterVis’ (Lamigueiro, 2018).

223 To compare and characterize the range of environmental conditions across the Central Desert  
224 and other regional centres of endemism we randomly sampled all environmental variables for  
225  $n$  cells in each region (with  $n$  being proportional to the area of the sampled polygon) and  
226 performed principal components analysis (PCA). We report variable loadings of the first and  
227 second principal components in Figure S2 (Supporting Information). To provide an additional  
228 line of evidence for local climatic stability, we compared interpolated Worldclim data (mean  
229 for 1970-2000) to more recent independent meteorological records from four contemporary  
230 weather stations (data period 1999-2017) in the central desert. Additional mapping and data  
231 visualization was performed using ‘ggplot2’ (Wickham 2009) and ‘rgeos’ (Bivand *et al.* 2018).

### 232 **Environmental niche modelling**

233 The suite of environmental layers retained for modelling was refined in three stages. First,  
234 layers that had low variability at the spatial scale of our study area were removed (e.g. soil).  
235 Second, correlated environmental variables across the study area ( $r > |0.7|$ ) were grouped, with  
236 a single variable from each group considered to be most relevant to arid environment plant  
237 ecology retained. Third, we performed an iterative selection procedure by removing variables  
238 with the highest Variance Inflation Factor (VIF) using the package ‘usdm’ (Naimi *et al.* 2014),  
239 with an upper threshold of  $VIF \leq 2.5$ . Retained environmental variables are reported in Table  
240 S3 (Supporting Information).

241 Environmental niche modelling was performed with MAXENT v3.3.3 (Phillips et al., 2006),  
242 implemented in the packages ‘Dismo’ (Hijmans et al., 2011) and ‘ENMeval’ (Muscarella *et al.*  
243 2014). To minimise model over-fitting, species data (including historic and incidental  
244 observations) were geographically rarefied to a 3 km bin size and examined across  
245 environmental space. Models were individually run and tuned for each study species over a  
246 study area encompassing the southern system, with quadrat surveys providing both presence  
247 and true absence data. Due to low sample sizes, data were partitioned using a jackknife  
248 approach where the number of model runs is equal to the number of occurrence localities, with  
249 a single data point excluded from each run for testing. Runs were performed iteratively across  
250 the full range of feature classes, with regularization multiplier values increasing from 1 to 4 in  
251 0.5 increments.

252 Models were evaluated based on Akaike’s Information Criterion corrected for small sample  
253 sizes (i.e. ( $\Delta AICc = 0$ ), which penalises models that employ a greater number of parameters to  
254 describe the data (Warren and Seifert 2011; Muscarella *et al.* 2014). We report  $AUC_{TEST}$   
255 averaged over all iterations, with higher values reflecting better model discrimination of  
256 presence locations from background absences. To quantify model overfitting we use two  
257 metrics. First, we report the mean difference in AUC between training and test data ( $AUC_{DIFF}$ );  
258 this is expected to be higher where models are overfit to training data (Muscarella *et al.* 2014).  
259 Second, we report the proportion of testing localities with predicted habitat suitability values  
260 lower than the training locality with the lowest reported value ( $OR_{MTP}$ ). For each species, the  
261 best performing model was projected across the study area and a Maximum Training  
262 Sensitivity Plus Specificity (MaSS) logistic threshold, which balances the trade-off between  
263 omission and commission errors (Lobo *et al.* 2008; Liu *et al.* 2016), was employed to estimate  
264 habitat area. For two species (OH, SG) where model evaluation indicated evidence of weak

265 overfitting, we used a Minimum Training Presence (MTP) threshold to ensure that all training  
266 observations are included within the predicted suitable habitat area.

267 In an effort to understand the abiotic drivers of the resulting distributions, several studies have  
268 shown that ranking variable contributions successfully captures biologically important factors  
269 (Kearney and Porter 2009; Searcy and Shaffer 2016). To assess relative variable importance  
270 across species we compare ranked permutation importance using Kendall's  $W$ , corrected for  
271 ties, implemented in the package 'irr' (Gamer *et al.* 2012). Secondly, we use linear regression  
272 to assess the relationship between the contribution of mean annual fog to model performance,  
273 and the species' trait score (see Tables S1-2, Supporting Information). Finally we calculated  
274 niche overlap across study species using the method of Warren, Glor and Turelli, (2008) and  
275 then combined thresholded species distribution classifications to identify areas of spatial  
276 overlap and co-occurrence of multiple species. RGB images were obtained from Sentinel 2  
277 (Copernicus Sentinel data 2015, processed by ESA, accessed from <https://remotepixel.ca/> on  
278 20/12/2018) and plotted with increased contrast. Surface wind direction data, averaged for the  
279 months June to August (2015-17), was obtained from the Global Forecasting System, via the  
280 package 'rWind' (Fernández-López 2018).

281

## 282 **RESULTS**

283 Evaluation of regional climate identifies a weak influence of the southern monsoon system on  
284 the Jiddat Al Arkad of the southern system (Figure 2). Concurrently, increased summer fog  
285 incidence in the southern Central Desert coincides with the warmest temperatures of the  
286 summer months, which appears to result in cooler coastal night time temperatures. Principal  
287 component analysis of abiotic variables clearly differentiated the major regions of endemism  
288 (Figure 3). Overall temperature related variables were the major contributors to PC1, with

289 precipitation differentiating PC2 (Figure S2, Supporting Information). The two Central Desert  
290 systems are found to be differentiated, but partially overlapping with 88.5% and 62% of points  
291 representing a unique climate variables for the northern and southern systems respectively.

292 Fieldwork surveys assessed 195 quadrats throughout the Southern System and successfully  
293 located all seven regional endemics. Study species were recorded in 41% of quadrats. In  
294 addition, 288 incidental and 68 historical observations were collated. After spatial filtering,  
295 177 records were retained (Table 2; Figure S1, Supporting Information). Mean pH and EC  
296 across all quadrats was 7.73 (SD = 0.44) and 14.99 (SD = 27.13) respectively. No significant  
297 difference in pH or EC values was identified across species (ANOVA  $p > 0.05$ ). In our  
298 assessment of fog and drought functional trait adaptation, *P. pulvinata* scored highest, and *S.*  
299 *gallagheri* scored lowest, with low stature, low leaf area and hairs the most frequent  
300 adaptations.

### 301 **Environmental niche modelling and variable importance**

302 After filtering, we retained nine environmental variables for modelling (Table S3, Supporting  
303 Information). Ecological niche model evaluation statistics are reported in Table 2. Modelling  
304 was not performed for *P. jazirensis* due to insufficient data.  $AUC_{TEST}$  ranged from 0.76 (PP)  
305 to 0.93 (SG). AUC values are often lower for more widespread species, which may be the case  
306 for *P. pulvinata* and *O. Harsusiticus* (Jiménez-Valverde *et al.* 2008). Model logistic habitat  
307 suitability projections are plotted in Figure 4, with the percentage contribution of variables  
308 reported in Table 3. Binary threshold maps are provided in Figure S3 (Supporting Information).  
309 The most important variables varied substantially, with no evidence of consistent rank  
310 importance across species ( $Wt = 0.079$ ,  $p = 0.87$ ). Annual mean fog did not appear to rank  
311 highly for any species, and was not significantly associated with fog adaptation trait scores ( $F_{1,4}$   
312 = 0.76,  $p = 0.4$ ). Niche overlap was high in all pairwise comparisons (median = 0.87; Table S4,  
313 Supplementary Information).

## 314 Identification of climate refugia

315 Combined binary species distributions identified a key area where all study species are  
316 predicted to co-occur (Figure 5A). High predicted habitat suitability across all models was  
317 localized to the southern Jiddat al Arkad. Satellite imagery shows the region, seasonal cloud  
318 cover and the prevailing summer wind direction in Figure 5B. Independent contemporary  
319 weather station records provide an additional line of evidence. Whilst the three northern  
320 stations show elevated maximum daily temperatures (period 2002-17) compared to the  
321 Worldclim 2 reference (1970-2000), Shalim station – close to our putative coastal fog and cloud  
322 affected area – shows summer maximum temperatures below the Worldclim 2 reference  
323 (Figure 6).

324

## 325 DISCUSSION

326 In this study we present evidence for a Southern Arabian Pleistocene refugium in Oman's  
327 Central Desert (Figures 2, 5). As shown by Sandel et al. (2011), the negative relationship  
328 between endemism and the increasing velocity of changing climate is strongest in poorly  
329 dispersing species such as plants. Therefore co-occurrence of a high number of endemic study  
330 species within a narrow monsoon-influenced region is indicative of a refugium with low  
331 climate change velocity (Sandel *et al.* 2011; Abellán and Svenning 2014; Harrison and Noss  
332 2017). Climate analysis identified cooler mean annual temperatures in the study area and the  
333 influence of coastal cloud and fog (Figure 2), which combined with novel survey data and  
334 environmental distribution modelling suggests that the vegetation of the southern Central  
335 Desert is a relict of an earlier, more mesic period. This is further supported by the biogeography  
336 of genera such as *Aerva*, *Searsia* and *Ochradenus* which have global distributions from Africa  
337 to South-East Asia, yet with endemic species restricted to Arabia (POWO 2018), indicating  
338 support for a refugium further back into the Neogene. Thus, this system may represent the

339 northernmost remnant of a continuous belt of mesic vegetation formerly ranging from Africa  
340 to Asia, with close links to the flora of East Africa (Kürschner, 1998; Patzelt, 2011).

341 The relictual distributions that we observe appear to be driven by the interaction of climate and  
342 topographic factors, in particular the influence of the southern monsoon. It had been speculated  
343 that parts of the Central Desert may be at the fringe of the monsoon-affected area (Patzelt,  
344 2015), thus benefiting from occasional low clouds, cool winds and coastal fog during the  
345 southern monsoon, but previously this could not be tested because of the lack of climate  
346 stations. Here, using evidence from remote sensing, we demonstrate that the southern monsoon  
347 does indeed influence the southern system of the Central Desert, with patterns of night time  
348 fog detected via the MODIS satellite also consistent with the limited reports available. This  
349 putatively places the southern Arabian coastal fog-influenced Central Desert together with  
350 other coastal fog deserts such as the Namib and Peruvian lomas (Cereceda *et al.* 2008; Henschel  
351 and Seely 2008), though based on limited fog adaptation traits in the flora, fog intensity may  
352 be lower.

353 By applying these climate data to systematic field records of endemic plants, we develop a  
354 suite of models characterizing each species' environmental niche. We show that despite small  
355 sample sizes it is possible to generate robust niche models, incorporating true absence data,  
356 which identify important areas of plant diversity. Surprisingly, the relative importance of  
357 retained climatic and topographic variables differed substantially across study species.  
358 Therefore, we conclude that it is not a single set of environmental variables contributing to the  
359 distribution of this unique flora. For example, whilst overall, aridity and mean annual  
360 temperature are unsurprisingly important predictors in an arid environment, almost all retained  
361 variables are important across specific taxa. Therefore our analysis does not support the  
362 hypothesis that it is predominantly fog that influences the distribution of this endemic flora,  
363 rather a range of factors appear to be important, consistent with the diverse traits and

364 phylogenetic provenance of the species. We note however that on a finer spatial scale, factors  
365 such as microrefugia and fog hydrology may have greater importance (Mclaughlin *et al.* 2017).  
366 Despite being recognised for its global importance, the arid Horn of Africa biodiversity hotspot  
367 is one of the most severely degraded, with less than 5% of habitat considered to be in pristine  
368 condition (Mittermeier *et al.* 2005; Mallon 2013). Key threats to the Central Desert include  
369 overgrazing (Ghazanfar, 2004), and climate change (Almazroui *et al.* 2013), with mean annual  
370 temperature for the Arabian Peninsula increasing at 0.6°C per decade and a significant  
371 decreasing trend in annual rainfall (Almazroui *et al.* 2013). It is also concerning that climate  
372 change has been associated with a historic shifts in intensity and northward extent of the  
373 monsoon (Fleitmann and Matter 2009) and elsewhere a contemporary decline in coastal fog  
374 frequency (Johnstone and Dawson 2010), with strong implications for persistence of endemic  
375 flora. In our study area, a relatively minor shift in the northward extent of the monsoon could  
376 have significant implications for regional climate.

377 Refugia have been suggested as priority sites to conserve global biodiversity under climate  
378 change precisely because of their demonstrated ability to facilitate species survival under  
379 adverse conditions (Keppel *et al.* 2012). Based on previous studies, it is also likely that refugial  
380 populations harbour the highest genetic diversity across the species' distribution (Meister,  
381 Hubaishan, Kilian, & Oberprieler, 2005), helping building future evolutionary resilience (Sgrò  
382 *et al.* 2011). This may be particularly important in the Central Desert, where many endemic  
383 species have been restricted to only a single refugial location, reducing potential for subsequent  
384 population admixture (Petit *et al.* 2003). The southern coast of the Arabian peninsula has also  
385 been predicted to contain a significant proportion of unassessed at-risk vascular plant species  
386 (Pelletier *et al.* 2018). In recent years, an Important Plant Area (IPA) programme has been  
387 initiated for the Middle East, which highlights the value of an ecological and evolutionary  
388 process-based view in identifying candidate conservation sites (Al-Abbasi *et al.* 2010).



389 Therefore, the site outlined here (Figure 5), covering approximately 880 km<sup>2</sup>, may be candidate  
390 for further evaluation and consideration as an IPA.

391 In conclusion, this study makes an important contribution to our understanding of southern  
392 Arabian climate refugia, and the biogeographical origins of the endemic flora of Oman's  
393 Central Desert. In the future we highlight the value of a network of detectors to characterise  
394 coastal fog across the landscape, particularly in the southern Central Desert. These would better  
395 enable an assessment of how coastal fog co-varies with other readily available datasets such as  
396 topography, cloud cover and land surface temperature to enable higher resolution predictions  
397 of the influence of coastal fog on species distributions. More generally, we emphasise the value  
398 of predictive modelling in the region to advance beyond initial presence-absence grids, both to  
399 identify the drivers of biogeographic patterns and to prioritise sites for the conservation. In the  
400 future, further identification and characterisation of southern Arabian climate refugia may be a  
401 useful strategy to support conservation in a global biodiversity hotspot.

402

403

404

405

406

407

408

409

410

411 **ACKNOWLEDGEMENTS**

412 We gratefully acknowledge field support from Fathi Al Hasani and Salim Al Rahbi, and a team  
413 of UK volunteers who assisted in data collection and logistics.

414 **FUNDING INFORMATION**

415 This work was supported by a fieldwork grant from the Anglo-Omani Society, UK, to the  
416 Central Desert Botanic Expedition team.

417

418

419

420

421

422

423

424

425

426

427

428

429

430

431 **LITERATURE CITED**

- 432 **Abellán P, Svenning JC. 2014.** Refugia within refugia - patterns in endemism and genetic  
433 divergence are linked to Late Quaternary climate stability in the Iberian Peninsula. *Biological*  
434 *Journal of the Linnean Society* **113**: 13–28.
- 435 **Al-Abbasi TM, Al-Farhan A, Al-Khulaidi AW, et al. 2010.** Important plant areas in the  
436 arabian peninsula. *Edinburgh Journal of Botany* **67**: 25–35.
- 437 **Almazroui M, Abid MA, Athar H, Islam MN, Ehsan MA. 2013.** Interannual variability of  
438 rainfall over the Arabian Peninsula using the IPCC AR4 global climate models. *International*  
439 *Journal of Climatology* **33**: 2328–2340.
- 440 **Bennett KD, Tzedakis PD, Willis KJ. 1991.** Quaternary refugia of north European trees. :  
441 103–115.
- 442 **Birks HJB, Willis KJ. 2008.** Alpines, trees, and refugia in Europe. *Plant Ecology and*  
443 *Diversity* **1**: 147–160.
- 444 **Bivand R, Stuetz R, Ove K, Giraudoux P, Davis M, Santilli S. 2018.** Package ‘rgeos.’
- 445 **Brinkmann K, Dickhoefer U, Schlecht E, Buerkert A. 2011.** Quantification of  
446 aboveground rangeland productivity and anthropogenic degradation on the Arabian Peninsula  
447 using Landsat imagery and field inventory data. *Remote Sensing of Environment* **115**: 465–  
448 474.
- 449 **Cereceda P, Larrain H, Osses P, Farías M, Egaña I. 2008.** The spatial and temporal  
450 variability of fog and its relation to fog oases in the Atacama Desert, Chile. *Atmospheric*  
451 *Research* **87**: 312–323.
- 452 **Chaurasia S, Sathiyamoorthy V, Paul Shukla B, Simon B, Joshi PC, Pal PK. 2011.** Night  
453 time fog detection using MODIS data over Northern India. *Meteorological Applications* **18**:

- 454 483–494.
- 455 **Chung M, Dufour A, Pluche R, Thompson S. 2017.** How much does dry-season fog  
456 matter? Quantifying fog contributions to water balance in a coastal California watershed.  
457 *Hydrological Processes* **31**: 3948–3961.
- 458 **Comes HP, Kadereit JW. 1998.** The effect of quaternary climatic changes on plant  
459 distribution and evolution. *Trends in Plant Science* **3**: 432–438.
- 460 **Delany MJ. 1989.** The zoogeography of the mammal fauna of southern Arabia. *Mammal*  
461 *Review* **19**: 133–152.
- 462 **Dilts TE, Weisberg PJ, Dencker CM, Chambers JC. 2015.** Functionally relevant climate  
463 variables for arid lands: A climatic water deficit approach for modelling desert shrub  
464 distributions. *Journal of Biogeography* **42**: 1986–1997.
- 465 **Dregne HE. 1976.** *Soils of Arid Regions*. Amsterdam: Elsevier Scientific Publishing  
466 Company.
- 467 **Elith J, Leathwick J. 2009.** Species distribution models: ecological explanation and  
468 prediction across space and time. *Annual Review of Ecology, Evolution, ...* **40**: 677–697.
- 469 **Fernández-López J. 2018.** rWind: Download, edit and include wind data in ecological and  
470 evolutionary analysis. *Ecography* **42**.
- 471 **Fick SE, Hijmans RJ. 2017.** *Fick, Hijmans - 2017 - WorldClim 2 new 1-km spatial*  
472 *resolution climate surfaces for global land areas.pdf*.
- 473 **Fischer DT, Still CJ, Williams AP. 2009.** Significance of summer fog and overcast for  
474 drought stress and ecological functioning of coastal California endemic plant species. *Journal*  
475 *of Biogeography* **36**: 783–799.

- 476 **Fisher M, Mamber DA. 1998.** Climate In: Ghazanfar SA, Fisher M, eds. *Vegetation of the*  
477 *Arabian Peninsula*. Dordrecht, The Netherlands: Kluwer Academic Publishers, 5–38.
- 478 **Fleitmann D, Matter A. 2009.** The speleothem record of climate variability in Southern  
479 Arabia. *Comptes Rendus - Geoscience* **341**: 633–642.
- 480 **Gamer M, Lemon J, Fellows I, Singh P. 2012.** Irr package for R, version 0.84.
- 481 **Gandini F, Achilli A, Pala M, et al. 2016.** Mapping human dispersals into the Horn of  
482 Africa from Arabian Ice Age refugia using mitogenomes. *Scientific Reports* **6**: 1–13.
- 483 **Ghazanfar SA. 1998.** Status of the flora and plant conservation in the sultanate of Oman.  
484 *Biological Conservation* **85**: 287–295.
- 485 **Ghazanfar SA. 2004.** Biology of the central desert of Oman. *Turkish Journal of Botany* **28**:  
486 65–71.
- 487 **Ghazanfar SA, Fisher M. 2013.** *Vegetation of the Arabian peninsula*. Springer Science &  
488 Business Media.
- 489 **Ghazanfar S, Gallagher M. 1998.** *Remarkable lichens from the Sultanate of Oman*.
- 490 **Harrison S, Noss R. 2017.** Endemism hotspots are linked to stable climatic refugia. *Annals*  
491 *of Botany* **119**: 207–214.
- 492 **Henschel JR, Seely MK. 2008.** Ecophysiology of atmospheric moisture in the Namib Desert.  
493 *Atmospheric Research* **87**: 362–368.
- 494 **Hijmans RJ. 2017.** raster: Geographic Data Analysis and Modeling. R package version 2.6-  
495 7.
- 496 **Hijmans RJ, Philips S, Leathwick J, Elith J. 2017.** dismo: Species Distribution Modeling.  
497 R package version 1.1-4.

- 498 **Hunt GE. 1973.** Radiative properties of terrestrial clouds at visible and infra-red thermal  
499 window wavelengths. *Quarterly Journal of the Royal Meteorological Society* **99**: 346–369.
- 500 **Jennings RP, Singarayer J, Stone EJ, et al. 2015.** The greening of Arabia: Multiple  
501 opportunities for human occupation of the Arabian Peninsula during the Late Pleistocene  
502 inferred from an ensemble of climate model simulations. *Quaternary International* **382**: 181–  
503 199.
- 504 **Jiménez-Valverde A, Lobo JM, Hortal J. 2008.** Not as good as they seem: The importance  
505 of concepts in species distribution modelling. *Diversity and Distributions* **14**: 885–890.
- 506 **Johnstone JA, Dawson TE. 2010.** Climatic context and ecological implications of summer  
507 fog decline in the coast redwood region James. *Proceedings of the National Academy of*  
508 *Sciences* **107**: 4533–4538.
- 509 **Jolly D, Prentice IC, Bonnefille R, et al. 2009.** Biome Reconstruction from Pollen and Plant  
510 Macrofossil Data for Africa and the Arabian Peninsula at 0 and 6000 Years Published by :  
511 Blackwell Publishing Stable URL : <http://www.jstor.org/stable/2846197>.
- 512 **Kearney M, Porter W. 2009.** Mechanistic niche modelling: Combining physiological and  
513 spatial data to predict species' ranges. *Ecology Letters* **12**: 334–350.
- 514 **Keppel G, Van Niel KP, Wardell-Johnson GW, et al. 2012.** Refugia: Identifying and  
515 understanding safe havens for biodiversity under climate change. *Global Ecology and*  
516 *Biogeography* **21**: 393–404.
- 517 **Kürschner H. 1998.** Biogeography and Introduction to Vegetation. In: Ghazanfar, S.A.,  
518 Fisher M, ed. *Vegetation of the Arabian Peninsula*. Dordrecht: Springer, .
- 519 **Larraín-Barrios B, Faúndez-Yancas L, Búrquez A. 2018.** Plant functional trait structure in  
520 two fog deserts of America. *Flora: Morphology, Distribution, Functional Ecology of Plants*

- 521 **243:** 1–10.
- 522 **Liu C, Newell G, White M. 2016.** On the selection of thresholds for predicting species  
523 occurrence with presence-only data. *Ecology and Evolution* **6:** 337–348.
- 524 **Lobo JM, Jiménez-Valverde A, Real R. 2008.** AUC: a misleading measure of the  
525 performance of predictive distribution models. *Global Ecology and Biogeography* **17:** 145–  
526 151.
- 527 **Mallon DP. 2013.** Global hotspots in the Arabian Peninsula. *Zoology in the Middle East*  
528 **7140.**
- 529 **Mclaughlin BC, Ackerly DD, Klos PZ, Natali J, Dawson TE, Thompson S. 2017.**  
530 Hydrologic refugia, plants, and climate change. *Global Change Biology* **23:** 2941–2961.
- 531 **Meister J, Hubaishan MA, Kilian N, Oberprieler C. 2005.** Chloroplast DNA variation in  
532 the shrub *Justicia areysiana* (Acanthaceae) endemic to the monsoon affected coastal  
533 mountains of the southern Arabian Peninsula. *Botanical Journal of the Linnean Society* **148:**  
534 437–444.
- 535 **Meister J, Hubaishan MA, Kilian N, Oberprieler C. 2006.** Temporal and spatial  
536 diversification of the shrub *Justicia areysiana* Deflers (Acanthaceae) endemic to the monsoon  
537 affected coastal mountains of the southern Arabian Peninsula. *Plant Systematics and*  
538 *Evolution* **262:** 153–171.
- 539 **Merow C, Smith MJ, Silander JA. 2013.** A practical guide to MaxEnt for modeling  
540 species' distributions: What it does, and why inputs and settings matter. *Ecography* **36:**  
541 1058–1069.
- 542 **Miller AG. 1994.** Dhofar Fog Oasis, Oman and Yemen. In: Davis SD, Heywood VH,  
543 Hamilton A., eds. *Centres of Plant Diversity, Vol. 1.* Gland: WWF, IUCN., 143–155.

- 544 **Miller AG, Cope TA. 1996.** *Flora of the Arabian Peninsula and Socotra, I.* Edinburgh:  
545 Edinburgh University Press.
- 546 **Miller AG, Nyberg JA. 1990.** Patterns of endemism in Arabia In: *Contributiones selectae ad*  
547 *floram et vegetationem orientis: proceedings of the Third Plant Life of southwest Asia*  
548 *Symposium, held.3–8.*
- 549 **Mittermeier RA, Gil PR, Hoffman M, et al. 2005.** *Hotspots Revisited: Earth's Biologically*  
550 *Richest and Most Endangered Terrestrial Ecoregions.* Monterrey, Mexico: Cemex,  
551 Conservation International and Agrupación Sierra Madre.
- 552 **MODIS Characterization Support Team (MCST). 2018.** *MODIS 1km Calibrated*  
553 *Radiances Product.*
- 554 **Muscarella R, Galante PJ, Soley-Guardia M, et al. 2014.** ENMeval: An R package for  
555 conducting spatially independent evaluations and estimating optimal model complexity for  
556 Maxent ecological niche models. *Methods in Ecology and Evolution* **5**: 1198–1205.
- 557 **Naimi B, Hamm NAS, Groen TA, Skidmore AK, Toxopeus AG. 2014.** Where is  
558 positional uncertainty a problem for species distribution modelling? *Ecography* **37**: 191–203.
- 559 **Parker AG. 2010.** Pleistocene Climate Change in Arabia: Developing a Framework for  
560 Hominin Dispersal over the Last 350 ka.
- 561 **Patel. 1992.** Geological Map of Juzor Al Halaaniyaat, Sheet NE 40 - 10 and Duqm and  
562 Madraca Sheet NE 40 - 03/07.
- 563 **Patzelt A. 2009.** *The mountain vegetation of northern Oman: Ecology, phytosociology and*  
564 *biogeography of Olea europaea and Juniperus excelsa woodlands and of weed vegetation on*  
565 *cultivated terraces. In: Victor, R., Robinson, M. (eds.) Al Jabal Al Akhdar Monograph.*
- 566 **Patzelt A. 2011.** The themeda quadrivalvis tall-grass savannah of Oman at the crossroad



- 567 between Africa and Asia. *Edinburgh Journal of Botany* **68**: 301–319.
- 568 **Patzelt A. 2014.** *Oman Plant Red Data Book*. Diwan of Royal Court, Oman Botanic Garden.
- 569 **Patzelt A. 2015.** Synopsis of the Flora and Vegetation of Oman, with Special Emphasis on  
570 Patterns of Plant Endemism. *Abhandlungen der Braunschweigischen Wissenschaftlichen*  
571 *Gesellschaft*: 282–317.
- 572 **Pelletier TA, Carstens BC, Tank DC, Sullivan J, Espíndola A. 2018.** Predicting plant  
573 conservation priorities on a global scale. *Proceedings of the National Academy of Sciences*  
574 **115**: 201804098.
- 575 **Perpinan Lamigueiro O. 2018.** Package “rasterVis” - Visualization Methods for Raster  
576 Data.
- 577 **Peterson AT, Papeş M, Soberón J. 2015.** Mechanistic and Correlative Models of Ecological  
578 Niches. *European Journal of Ecology* **1**: 28–38.
- 579 **Petit RJ, Petit J, Aguinagalde I, et al. 2003.** Genetic Diversity Glacial Refugia : Hotspots  
580 But Not. *Science* **1563**: 1563–5.
- 581 **Phillips SJ, Anderson RP, Schapire RE. 2006.** Maximum entropy modeling of species  
582 geographic distributions. *Ecological Modelling* **190**: 231–259.
- 583 **POWO. 2018.** *Plants of the World Online*. <http://www.plantsoftheworldonline.org/>. 29 Dec.  
584 2018.
- 585 **R Development Core Team. 2014.** R: A language and environment for statistical  
586 computing. *Foundation for Statistical Computing, Vienna, Austria*.
- 587 **Rastogi B, Williams AP, Fischer DT, et al. 2016.** Spatial and temporal patterns of cloud  
588 cover and fog inundation in coastal California: Ecological implications. *Earth Interactions*

589 **20.**

590 **Raven PH, Axelrod DI. 1974.** Angiosperm Biogeography and Past Continental Movements.

591 *Annals of the Missouri Botanical Garden* **61**: 539–673.

592 **RStudio Team. 2016.** RStudio: Integrated Development for R. *RStudio, Inc., Boston, MA.*

593 **Sandel B, Arge L, Dalsgaard B, et al. 2011.** The Influence of Late Quaternary. *Science* **334**:

594 660–664.

595 **Schemenauer RS, Cereceda P, Carvajal N. 1987.** Measurements of Fog Water Deposition

596 and Their Relationships to Terrain Features. *Journal of Applied Meteorology* **26**: 1285–1292.

597 **Searcy CA, Shaffer HB. 2016.** Do Ecological Niche Models Accurately Identify Climatic

598 Determinants of Species Ranges? *The American Naturalist* **187**:4: 423–435.

599 **Sgrò CM, Lowe AJ, Hoffmann AA. 2011.** Building evolutionary resilience for conserving

600 biodiversity under climate change. *Evolutionary Applications* **4**: 326–337.

601 **Stanley Price MR, Al-Harthy AH, Whitcombe RP. 1988.** Fog moisture and its ecological

602 effects in Oman In: *Arid Lands: Today and Tomorrow*.69–88.

603 **Title PO, Bemmels JB. 2018.** ENVIREM: an expanded set of bioclimatic and topographic

604 variables increases flexibility and improves performance of ecological niche modeling.

605 *Ecography* **41**: 291–307.

606 **Wan Z, Hook S, Hulley G. 2018.** *MOD11A1 MODIS/Terra Land Surface Temperature and*

607 *the Emissivity Daily L3 Global 1km SIN Grid.*

608 **Wang N, Borrell JS, Bodles WJ a, Kuttapitiya A, Nichols R a., Buggs RJ a. 2014.**

609 Molecular footprints of the Holocene retreat of dwarf birch in Britain. *Molecular Ecology* **23**:

610 2771–2782.

- 611 **Warren DL, Glor RE, Turelli M. 2008.** Environmental niche equivalency versus  
612 conservatism: Quantitative approaches to niche evolution. *Evolution* **62**: 2868–2883.
- 613 **Warren DL, Seifert SN. 2011.** Ecological niche modeling in Maxent : the importance of  
614 model complexity and the performance of model selection criteria. *Ecological Applications*  
615 **21**: 335–342.
- 616 **White F, Léonard J. 1990.** Phytogeographical links between Africa and southwest Asia In:  
617 *Contributiones selectae ad floram et vegetationem orientis: proceedings of the Third Plant*  
618 *Life of southwest Asia Symposium, held.3–8.*
- 619 **Whybrow PJ, McClure HA. 1981.** Fossil Mangrove Roots and Palaeoenvironments of the.  
620 **32**: 213–225.
- 621 **Wickham H. 2009.** ggplot2. Elegant graphics for data analysis. *Springer*: 210.
- 622 **Wilson AM, Jetz W. 2016.** Remotely Sensed High-Resolution Global Cloud Dynamics for  
623 Predicting Ecosystem and Biodiversity Distributions. *PLoS Biology* **14**: 1–20.
- 624 **Zhang H, Schroder JL, Pittman JJ, Wang JJ, Payton ME. 2005.** Soil Salinity Using  
625 Saturated Paste and 1:1 Soil to Water Extracts. *Soil Science Society of America Journal* **69**:  
626 1146.
- 627
- 628
- 629
- 630
- 631
- 632

633 **TABLES**

634

635 **Table 1.** Summary of the seven study taxa, including Red List status from Patzelt (2014).

| ID | Species <sup>1</sup>                                                               | Family          | Habitat description                                                                                                                   | Status <sup>2</sup> |
|----|------------------------------------------------------------------------------------|-----------------|---------------------------------------------------------------------------------------------------------------------------------------|---------------------|
| AA | <i>Aerva artemisoides</i> Vierh. & O. Schwartz subsp. <i>Batharitica</i> A.G. Mill | Amaranthaceae   | Coastal areas including dry cliffs, rocky slopes and wadi banks on limestone, 20-300 m.                                               | VU                  |
| HG | <i>Hyoscyamus gallagheri</i> A.G. Mill. & Biagi.                                   | Solanaceae      | Low sand dunes and gravel desert, 0-250 m.                                                                                            | VU                  |
| OH | <i>Ochradenus harsusiticus</i> A.G. Mill.                                          | Resedaceae      | Open <i>Acacia tortilis</i> - <i>Prosopis cineraria</i> woodland, in sandy and gravelly depressions of the central desert, 100-210 m. | VU                  |
| PJ | <i>Polycarpaea jazirensis</i> R. A. Clement.                                       | Caryophyllaceae | Coastal areas of Sahil al Jazir in sandy depressions and on limestone cliffs, 100-210 m.                                              | CR                  |
| PP | <i>Pulicaria pulvinate</i> E. Gamal-Eldin                                          | Asteraceae      | Limestone cliffs and central limestone plateau on sand and gravel, 0-300 m.                                                           | NT                  |
| SG | <i>Searsia gallagheri</i> Ghaz.                                                    | Anacardiaceae   | Stony wadis and depressions, 130-205 m.                                                                                               | VU                  |
| SH | <i>Salvia</i> aff. <i>Hillcoatiae</i> R.A. Clement                                 | Lamiaceae       | Dry limestone plateau of the central desert, 0-300 m.                                                                                 | VU                  |

636 <sup>1</sup>Voucher specimens are deposited at the Oman Botanic Gardens, accession numbers (OH: CDBE-1; PP: CDBE-2; SH: CDBE-  
637 3; PJ:CDBE-4; SG: CDBE-5, 6). <sup>2</sup>All assessments are global assessments which have been submitted to IUCN to be included  
638 to the Global Red List of Threatened Species, with the exception of a national assessment for *S. gallagheri*. The relationship  
639 between *S. gallagheri* (formerly *Rhus*) and *S. vulgaris* awaits more detailed taxonomic investigation, thus a national  
640 assessment is reported.

641

642

643

644

645

646

647

648

649

650

651

652

653

654

655 **Table 2.** Environmental niche model input and evaluation statistics.

| Species | Pre-filtering observations |          |            | Post-filtering | Model evaluation |     |                     |                     |                   |            |
|---------|----------------------------|----------|------------|----------------|------------------|-----|---------------------|---------------------|-------------------|------------|
|         | Incidental                 | Quadrats | Historical |                | Features         | RM  | AUC <sub>TEST</sub> | AUC <sub>DIFF</sub> | OR <sub>MTP</sub> | Parameters |
| AA      | 161                        | 20       | 12         | 41             | L                | 2.5 | 0.84                | 0.11                | 0.05              | 6          |
| HG      | 34                         | 4        | 19         | 23             | L                | 1.5 | 0.82                | 0.08                | 0.04              | 5          |
| OH      | 16                         | 3        | 13         | 13             | L                | 0.5 | 0.79                | 0.15                | 0.23              | 6          |
| PJ      | 8                          | 0        | 1          | 4              | -                | -   | -                   | -                   | -                 | -          |
| PP      | 19                         | 45       | 18         | 54             | LQHP             | 2.5 | 0.76                | 0.11                | 0.04              | 10         |
| SG      | 35                         | 7        | 0          | 17             | L                | 2   | 0.93                | 0.03                | 0.12              | 4          |
| SH      | 15                         | 15       | 0          | 25             | LQ               | 1.5 | 0.89                | 0.05                | 0.04              | 8          |

656 Feature classes: Linear L, Quadratic Q, Hinge H, Product P and Threshold T. RM = regularization multiplier.

657

658

659

660

661

662

663

664

665

666

667

668

669

670

671

672

673

674

675

676

677

678

679

680 **Table 3.** Percentage contribution of environmental variables to environmental niche models  
681 across study species.

| Environmental variable     | AA   | HG   | OH   | PP   | RG   | SH   | Mean (SD)   |
|----------------------------|------|------|------|------|------|------|-------------|
| Night LST                  | 22.7 | 0.0  | 0.0  | 1.3  | 4.1  | 2.6  | 5.1 (8.8)   |
| Mean annual cloud cover    | 0.0  | 2.2  | 0.0  | 2.4  | 0.0  | 1.6  | 1.0 (1.2)   |
| Cloud cover seasonality    | 0.5  | 31.2 | 0.0  | 2.9  | 0.4  | 9.4  | 7.4 (12.2)  |
| Thornthwaite aridity index | 44.5 | 0.0  | 4.2  | 0.0  | 82.3 | 0.8  | 22.0 (34.3) |
| Aspect                     | 0.0  | 0.0  | 10.2 | 1.6  | 0.0  | 33.7 | 7.6 (13.4)  |
| Elevation                  | 0.0  | 40.6 | 33.1 | 37.7 | 0.0  | 26.7 | 23.0 (18.4) |
| Mean annual fog            | 8.0  | 3.4  | 13.7 | 2.5  | 0.9  | 9.0  | 6.2 (4.8)   |
| Terrain roughness index    | 24.0 | 0.0  | 7.6  | 21.1 | 12.4 | 5.0  | 11.7 (9.4)  |
| Annual mean temperature    | 0.5  | 22.6 | 31.3 | 30.4 | 0.0  | 11.1 | 16.0 (14.2) |

682

683

684

685

686

687

688

689

690

691

692

693

694

695

696

697

698

699

700

701

702

703

704

705 **FIGURE LEGENDS**

706 **Figure 1.** Images of the endemic Central Desert plant species included in this study. a) *Aerva*  
707 *artemisoides subsp. batharitica*; b) *Hyoscyamus gallagheri*; c) *Ochradenus harsusiticus*; d)  
708 *Polycarphae jazirensis*; e) *Pulicaria pulvinata*; f) *Salvia aff. hillcoatiae*; g) *Searsia gallagheri*;  
709 h) A typical Central Desert landscape.

710 **Figure 2.** a) Elevation map of Oman, with annual offshore cloud cover percentage identifying  
711 the major southern and Indian monsoon climate patterns. Cloud cover over land is not shown,  
712 but is negligible for the Central Desert. Northern and southern study systems are denoted by  
713 shaded polygons. b) Quarterly mean temperature across the Central Desert. c) Quarterly night  
714 time fog intensity (change in brightness temperature) across the Central Desert. Higher values  
715 (less negative) are indicative of greater fog intensity.

716 **Figure 3.** Principal component analysis of abiotic variables across principal ecoregions of  
717 Oman. Grey points denote a random background sample from across Oman. The five major  
718 centres of plant endemism comprise i) the Hajar Mountains; ii-iii) the Dhofar Mountains  
719 comprising the Jabal Samhan and Jabal Al Qamar/Qara centres of endemism, combined for the  
720 purposes of this figure; iv) the Northern Central Desert consisting of the Jiddat Al Harasis/Huqf  
721 and v) the Southern Central Desert comprising the Sahil Al Jazir/Jiddat Al Arkad. The Empty  
722 Quarter is plotted (yellow) for reference as it comprises a significant proportion of Oman's  
723 land area, but is not considered a centre of endemism. The candidate refugium (red) is a subset  
724 of the southern system of the Central Desert.

725 **Figure 4.** Environmental niche models for each of six study species across the southern Central  
726 Desert. Higher values indicative of greater modelled habitat suitability. Dashed line denotes  
727 the southern Central Desert system.

728 **Figure 5.** Identification of endemic species co-occurrence in the southern Central Desert. a)  
729 Composite map of the binary distributions of six study species. Dashed line identifies a region  
730 of high diversity with potential as a candidate Important Plant Area. b) False colour Sentinel 2  
731 image of the high diversity area. Red line shows a primary road crossing the study area. Inset  
732 rose diagram shows the prevailing wind direction during the Khareef (Southern Monsoon).  
733 Cloud cover mean is shown in blue.

734 **Figure 6.** Locations of Omani weather stations contributing to interpolated climate variables  
735 used in this study (1970-2000), as well as four independent validation weather stations from  
736 the Central Desert (1999-2017). Maximum daily temperature recorded at these stations is  
737 reported (coloured by year), with the black line denoting the historic Worldclim 2 average for  
738 this period. Northern and southern systems are depicted in blue and orange, respectively.

739

740

741

742

743

744

745



746 **FIGURES**

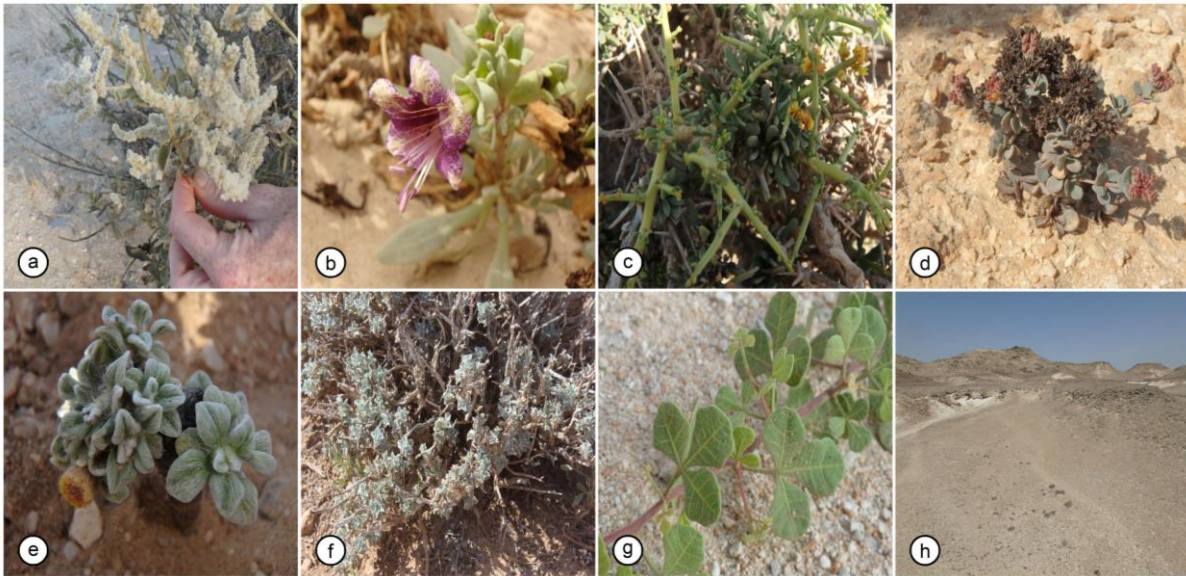

747

748 **Figure 1.**

749

750

751

752

753

754

755

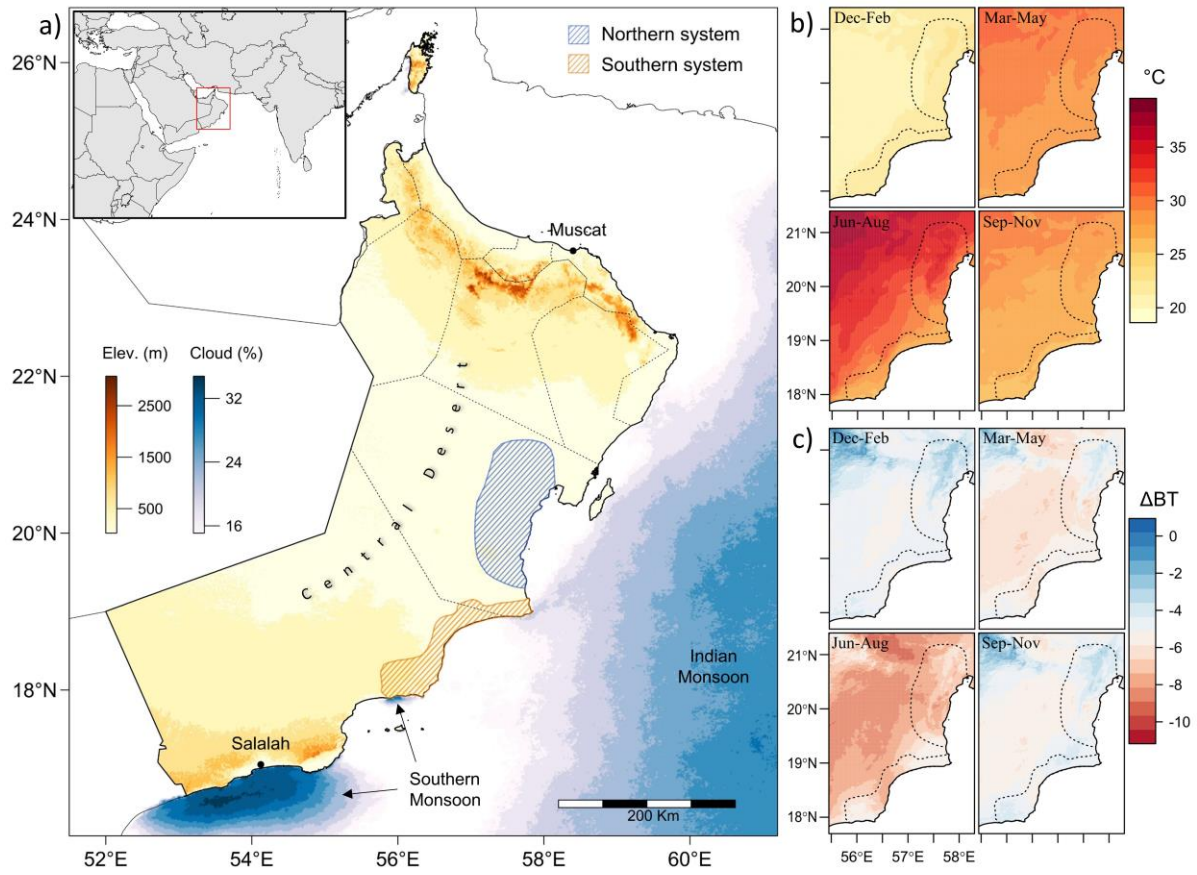

756

757 **Figure 2.**

758

759

760

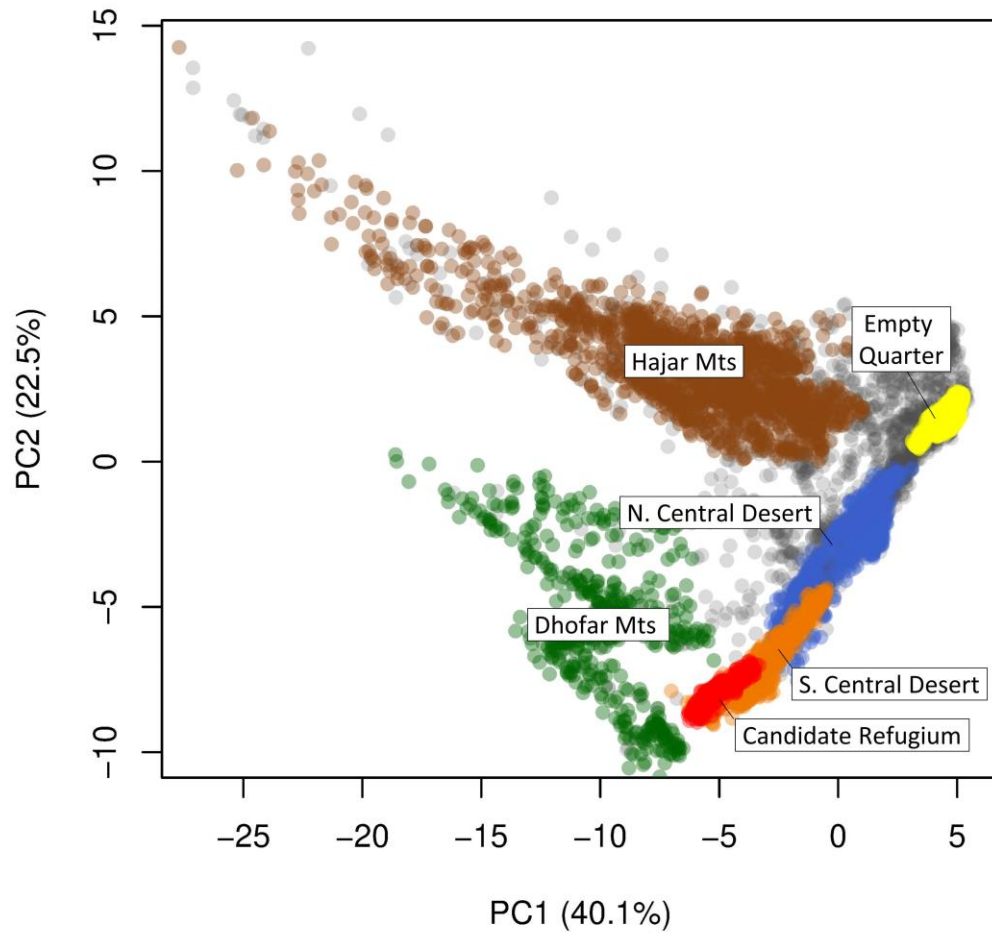

761

762 **Figure 3.**

763

764

765

766

767

768

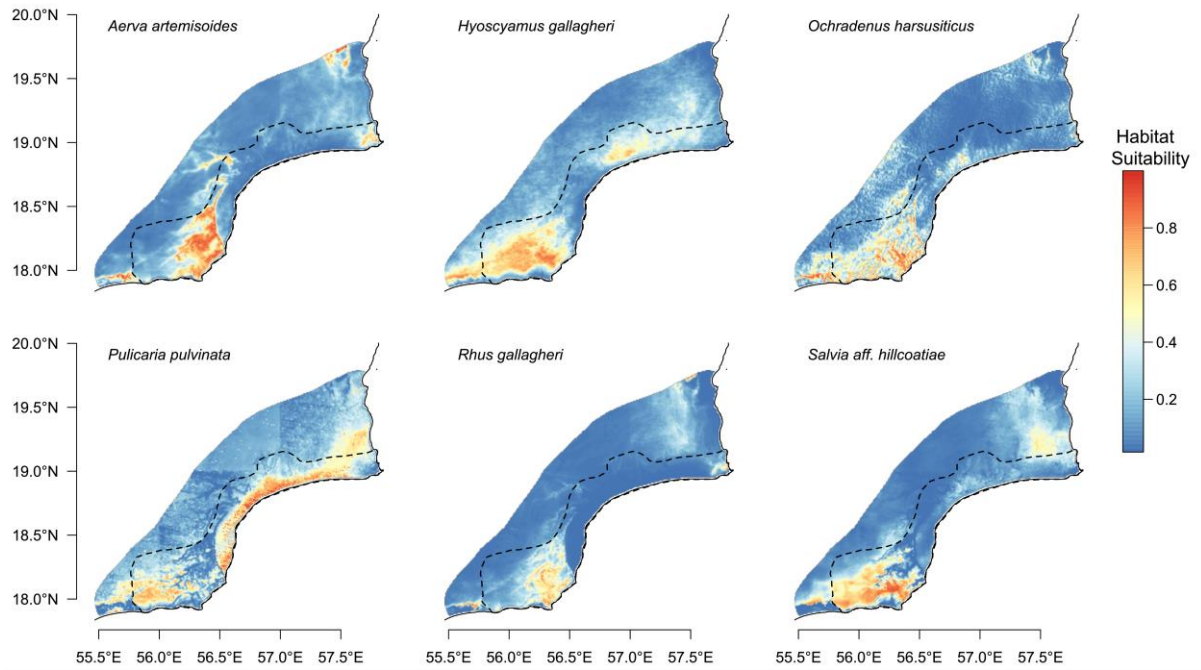

769 **Figure 4.**

770

771

772

773

774

775

776

777

778

779

780

781

782

783

784

785

786

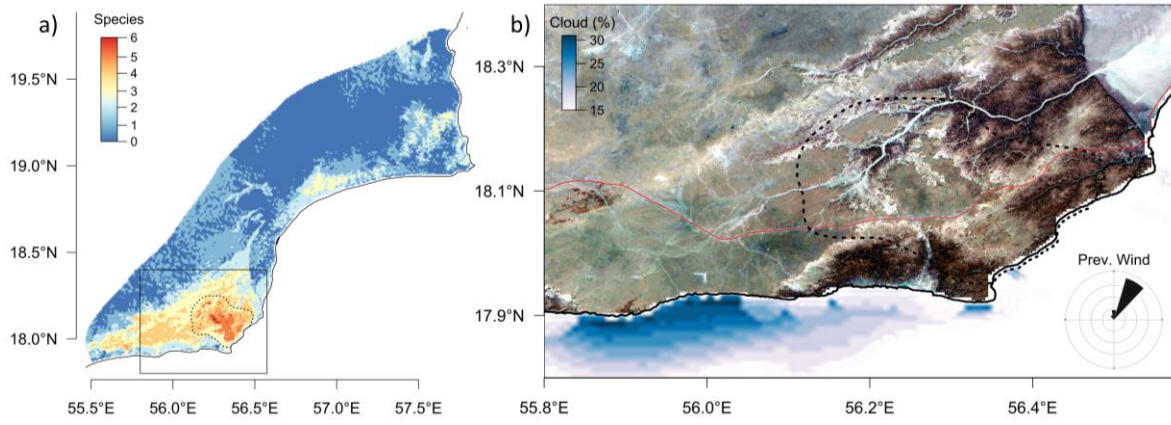

787

788 **Figure 5.**

789

790

791

792

793

794

795

796

797

798

799

800

801

802

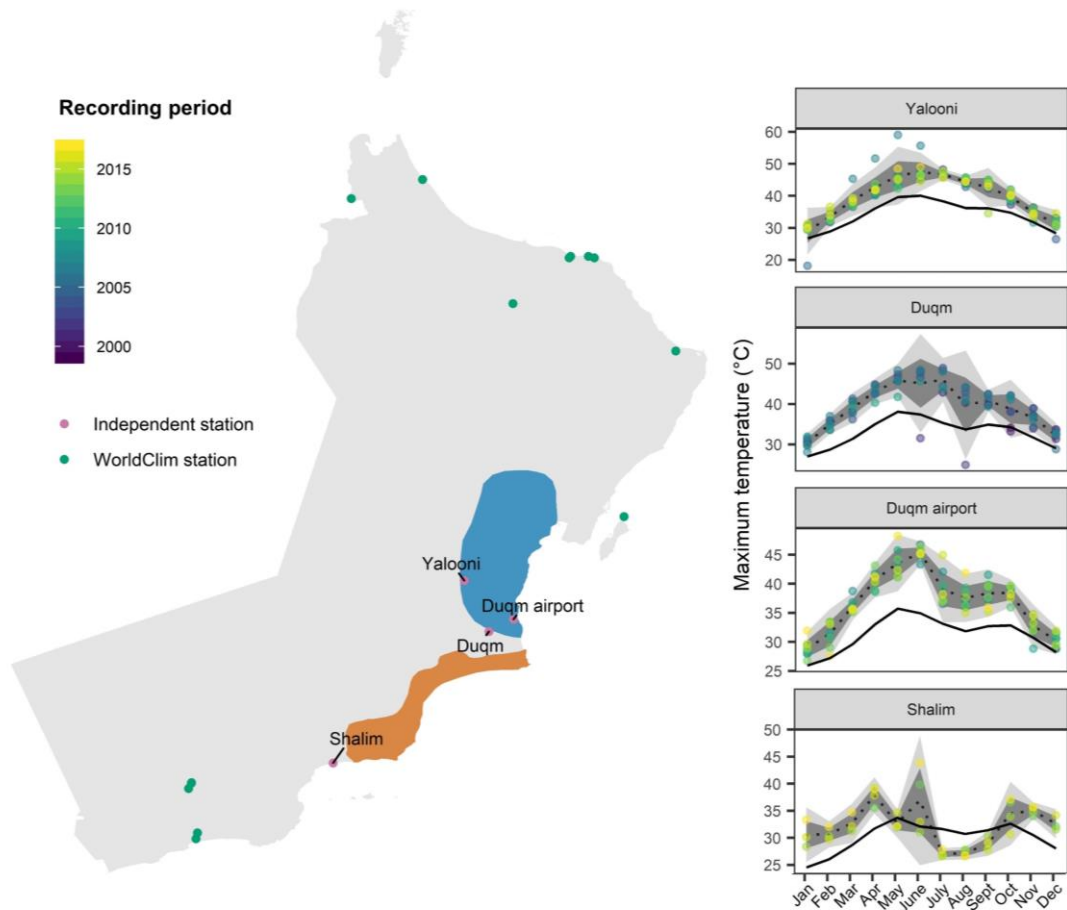

803

804 **Figure 6.**

805

806

807

808

809

810

811

812

813

814

815

816 **DATA ACCESSIBILITY**

817 All topographic and environmental GIS layers used in this study are freely available from the  
818 sources outlined in Table S3, Supporting Information. Raw meteorological data for Central  
819 Desert climate stations are available on request from the Meteorological Society of Oman.  
820 Novel species observation records from the Central Desert will be provided on the Global  
821 Biodiversity Information Facility.

822 **BIOSKETCH**

823 The research reported here emerged from the Central Desert Botanic Expedition 2017 and is  
824 the result of an ongoing collaboration between British scientists, volunteer participants and the  
825 Oman Botanic Garden. Initiated in collaboration with the British Exploring Society in 2012,  
826 collaborative teams have conducted research across several locations in Dhofar with further  
827 research planned in the Musandam peninsula. Fieldwork has been generously supported by the  
828 Anglo-Omani Society which seeks to promote understanding and friendship between Britain  
829 and Oman, particularly through scientific and cultural exchange. J.B., G.I., D.L., A.S.R. and  
830 A.P. conceived the idea, all authors (bar T.W. and A.P.) participated in fieldwork. J.B., T.S.,  
831 R.S. and T.W. performed analysis and J.B., D.L. and A.P. led the writing. All authors approved  
832 the final version of this manuscript.
